# Supplementary material for: Nafion-stabilised bimetallic Pt–Cr nanoparticles as electrocatalysts for proton exchange membrane fuel cells (PEMFCs)
Source: Royal Society of Chemistry journal article supplement (doi:10.1039/c6ra16025e), 2016-01-01
Supplement: c6ra16025e1.pdf [file c6ra16025e1.pdf]

## Supporting Information

### **Nafion-stabilised bimetallic Pt-Cr nanoparticles as electrocatalysts for proton exchange membrane fuel cells (PEMFCs)**

G. Gupta<sup>a</sup>, S. Sharma<sup>a</sup> and P.M. Mendes<sup>a,\*</sup>

<sup>a</sup>*School of Chemical Engineering, University of Birmingham, Edgbaston, Birmingham, B15 2TT, UK.*

| <b>Correspondence Address</b>                                                                                                                                                                   |
|-------------------------------------------------------------------------------------------------------------------------------------------------------------------------------------------------|
| Professor Paula M Mendes<br>School of Chemical Engineering<br>University of Birmingham<br>Edgbaston, Birmingham, B15 2TT (UK)<br>Tel: Int. code +(121) 414-5343<br>Email: p.m.mendes@bham.ac.uk |

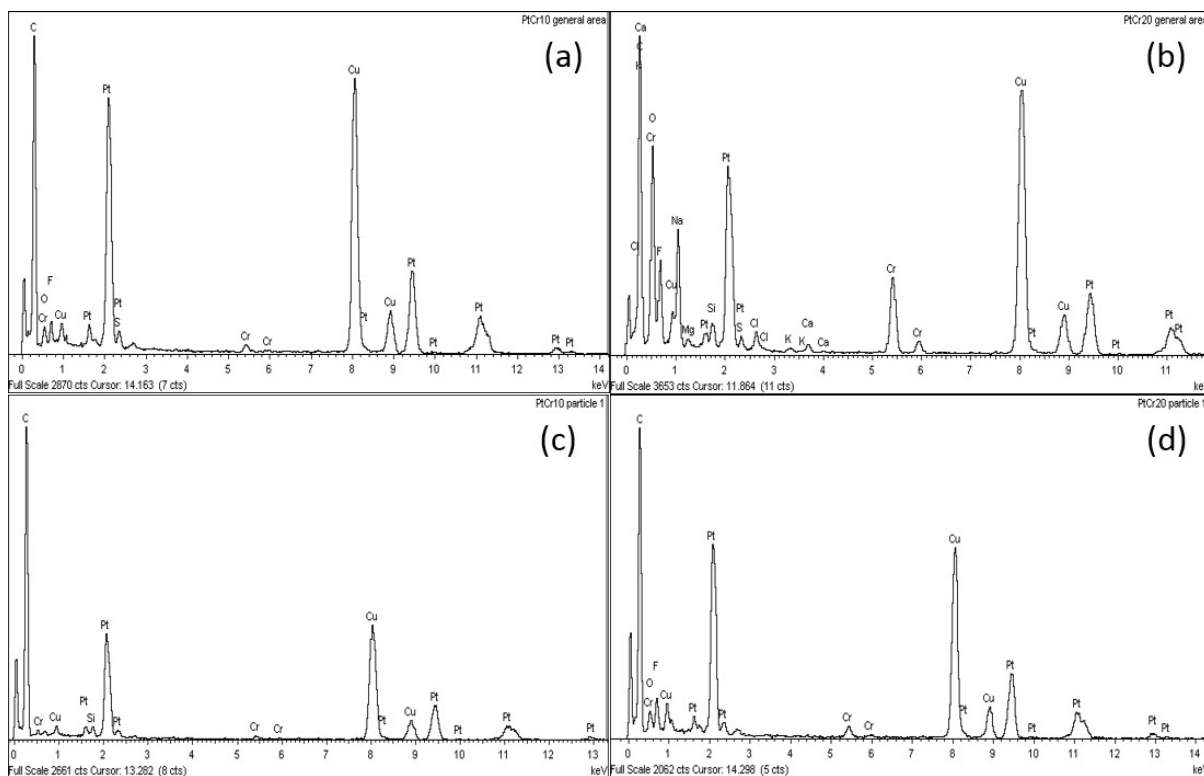

Figure S1: EDX graphs of Pt-Cr 10 (a- area, c-particle) and Pt-Cr 20 (b- area, d- particle) samples.

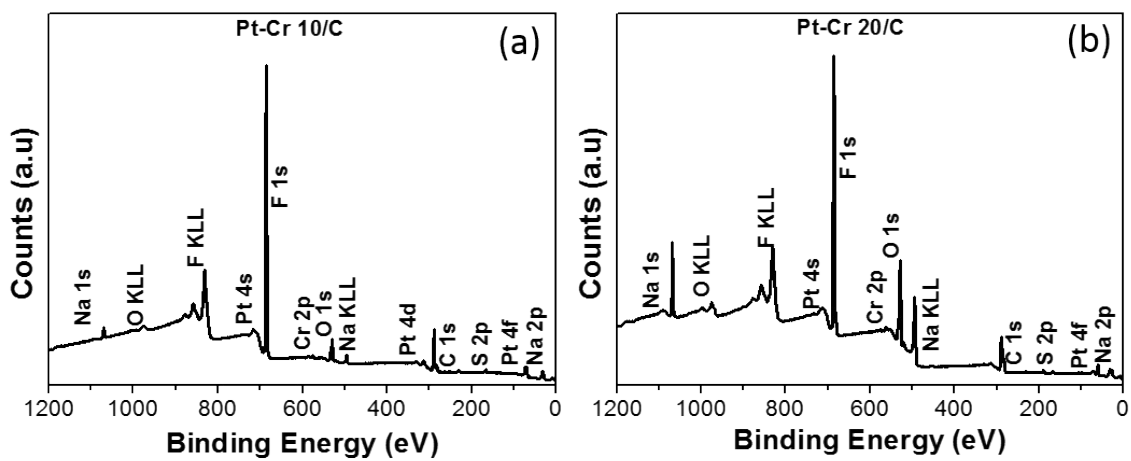

Figure S2: Survey spectra of Pt-Cr 10 and Pt-Cr 20 samples.

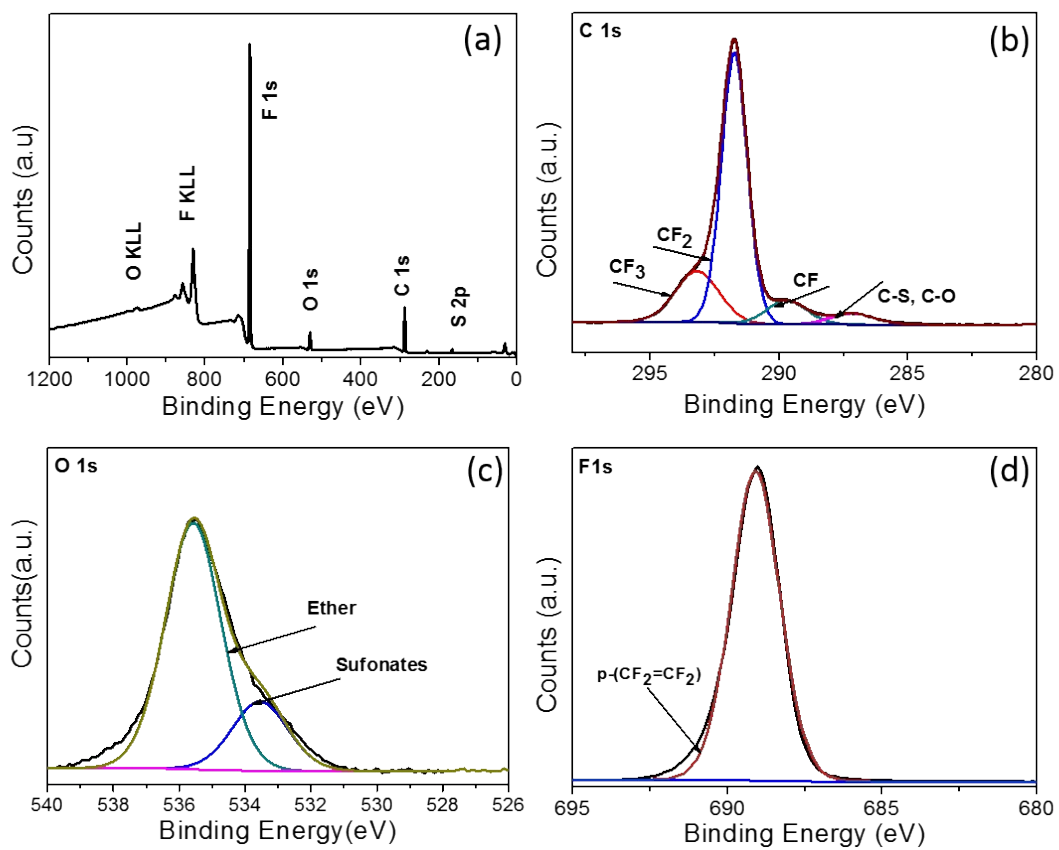

Figure S3: XPS spectra of Nafion.

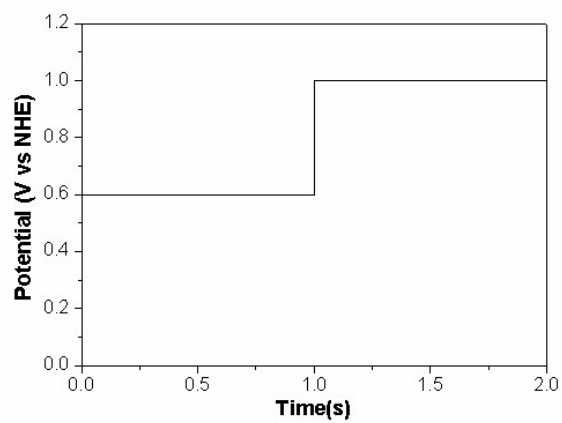

Figure S4: Accelerated stress testing profile.

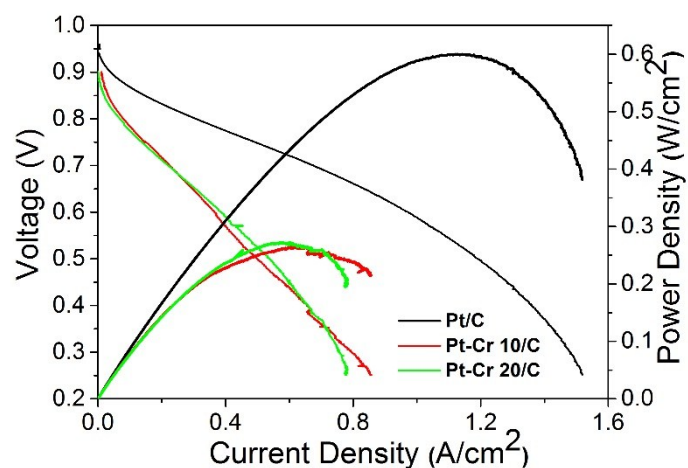

Figure S5: Current density and power density curves for Pt/C, Pt-Cr 10/C and Pt-Cr 20/C in single cell fuel cell testing condition after preparation of membrane electrode assembly.

Table S1: (a) Atomic ratio of elements present in the samples as calculated from XPS, (b) ratio of Pt and Cr present in the samples.

| Sample<br>Elements | Pt-Cr 10     | Pt-Cr 20     |
|--------------------|--------------|--------------|
| <b>Pt (at. %)</b>  | 0.63 ± 0.007 | 0.64 ± 0.004 |
| <b>Cr (at. %)</b>  | 0.27 ± 0.005 | 0.16 ± 0.003 |
| <b>C (at. %)</b>   | 35.02 ± 0.35 | 33.03 ± 0.51 |
| <b>O (at. %)</b>   | 9.01 ± 0.25  | 20.01 ± 0.43 |
| <b>F (at. %)</b>   | 52.97 ± 0.42 | 39.96 ± 0.56 |
| <b>Na (at. %)</b>  | 1.05 ± 0.04  | 5.36 ± 0.06  |
| <b>S (at. %)</b>   | 1.05 ± 0.03  | 0.84 ± 0.04  |

| Sample   | Ratio of Pt:Cr |
|----------|----------------|
| Pt-Cr 10 | 70:30          |
| Pt-Cr-20 | 80:20          |

Sample calculation for estimating the amount of Pt and Cr in the samples:

**1) Pt-Cr 10**

Assuming amount of sample = 5 mg

From TGA, amount of metal = 55 wt.%

$$\text{Amount of metal} = \frac{55}{100} * 5 = 2.75 \text{ mg}$$

From XPS & EDX, Amount of Pt = 70 at.% = 89.75 wt.%

Amount of Cr = 30 at.% = 10.25 wt.%

$$\text{Amount of Pt in the sample} = \frac{89.75}{100} * 2.75 = 2.47 \text{ mg}$$

$$\text{Amount of Cr in the sample} = \frac{10.25}{100} * 2.75 = 0.28 \text{ mg}$$

**2) Pt-Cr 20**

Assuming amount of sample = 5 mg

From TGA, amount of metal = 43 wt.%

$$\text{Amount of metal} = \frac{43}{100} * 5 = 2.15 \text{ mg}$$

From XPS & EDX, Amount of Pt = 80 at.% = 93.75 wt.%

Amount of Cr = 20 at.% = 6.25 wt.%

$$\text{Amount of Pt in the sample} = \frac{93.75}{100} * 2.15 = 2.02 \text{ mg}$$

$$\text{Amount of Cr in the sample} = \frac{6.25}{100} * 2.15 = 0.13 \text{ mg}$$
